# Supplementary material for: Region-Specific Decellularization of Porcine Uterine Tube Extracellular Matrix: A New Approach for Reproductive Tissue-Engineering Applications
Source: Preprints.org preprint supplement (doi:10.20944/preprints202405.1629.v1), 2024-05-24
Supplement: Supplementary file 1 [file supplementary]

**Supplementary Information**

**Table S1.** Quantitative data of ECM general components of native and decellularized tubal tissues. The data are expressed by the mean ± standard deviation (SD).

| **Analyzed ECM component** | **Infundibulum** | | **Ampulla** | | **Isthmus** | |
| --- | --- | --- | --- | --- | --- | --- |
|  | **Native** | **Decell** | **Native** | **Decell** | **Native** | **Decell** |
| Total Collagen Content | 125.924 ± 5.895 | 112.906 ± 4.295 | 128.414 ± 5.197 | 118.139 ± 8.815 | 156.913 ± 8.405 | 154.801 ± 12.031 |
| Thick Collagen Fibers Density (%) | 6.060 ± 0.987 | 7.333 ± 0.584 | 7.720 ± 2.199 | 9.340 ± 0.553 | 10.725 ± 2.199 | 12.083 ± 0.985 |
| Thin Collagen Fibers Density (%) | 5.770 ± 1.299 | 7.063 ± 0.453 | 5.953 ± 0.638 | 6.727 ± 0.696 | 8.746 ± 0.392 | 8.773 ± 0.768 |
| Total GAGs Content | 105.920 ± 8.139 | 90.707 ± 3.935 | 111.302 ± 12.848 | 87.197 ± 1.343 | 108.254 ± 5.540 | 101.524 ± 8.585 |
| Elastic Fibers Content | 13.944 ± 3.298 | 14.763 ± 1.482 | 11.466 ± 0.912 | 18.016 ± 3.328* | 16.682 ± 1.987 | 22.489 ± 2.210* |

* Statistically significant with p < 0.05 when compared with native group.

**Table S2.** Quantitative data of ECM main components of native and decellularized tubal tissues. The data are expressed by the mean ± standard deviation (SD).

| **Analyzed ECM component** | **Infundibulum** | | **Ampulla** | | **Isthmus** | |
| --- | --- | --- | --- | --- | --- | --- |
|  | **Native** | **Decell** | **Native** | **Decell** | **Native** | **Decell** |
| Type I Collagen | 87.690 ± 4.285 | 97.662 ± 13.053 | 106.013 ± 8.618 | 112.763 ± 18.417 | 117.777 ± 14.020 | 132.154 ± 14.737 |
| Type III Collagen | 61.771 ± 15.585 | 88.598 ± 12.602 | 94.976 ± 11.382 | 112.704 ± 7.545 | 123.815 ± 13.344 | 124.082 ± 13.146 |
| Elastin | 69.472 ± 10.155 | 80.045 ± 6.506 | 63.166 ± 7.782 | 104.184 ± 8.309* | 63.735 ± 6.210 | 112.969 ± 13.030* |
| Fibronectin | 48.475 ± 13.610 | 72.710 ± 17.353 | 79.024 ± 15.933 | 94.162 ± 8.708 | 88.564 ± 14.783 | 88.077 ± 11.960 |
| Laminin | 45.550 ± 6.346 | 47.080 ± 19.299 | 36.149 ± 9.788 | 38.596 ± 5.206 | 47.514 ± 16.834 | 49.380 ± 16.579 |

* Statistically significant with p < 0.05 when compared with native group.
